# Supplementary material for: Constructing nanoneedle arrays of heterostructured RuO2–Co3O4 with tip-effect-induced enrichment of reactants for enhanced water oxidation
Source: Royal Society of Chemistry journal article supplement (doi:10.1039/d5cc01933h), 2025-01-01
Supplement: d5cc01933h1.pdf [file d5cc01933h1.pdf]

Electronic Supplementary Information

**Constructing Nanoneedle Arrays of Heterostructured RuO<sub>2</sub>-Co<sub>3</sub>O<sub>4</sub>  
with Tip-effect-induced Enrichment of Reactants for Enhanced Water  
Oxidation**

Xu Zhang,<sup>a</sup> Junnan Song,<sup>a\*</sup> Tongming Sun,<sup>b</sup> Minmin Wang,<sup>b</sup> Jinli Zhu,<sup>b</sup> Yang Yu,<sup>c\*</sup> and Jiacheng Wang<sup>a\*</sup>

<sup>a</sup> Zhejiang Key Laboratory for Island Green Energy and New Materials, Institute of Electrochemistry, School of Materials Science and Engineering, Taizhou University, Taizhou 318000, Zhejiang, China.

<sup>b</sup> College of Chemistry and Chemical Engineering, Nantong University, Nantong 226019, Jiangsu, China.

<sup>c</sup> School of Pharmaceutical Sciences, Taizhou University, Taizhou 318000, Zhejiang, China.

# 1. Experimental section

## 1.1 Chemicals

Cobalt nitrate hexahydrate ( $\text{Co}(\text{NO}_3)_2 \cdot 6\text{H}_2\text{O}$ , AR), ruthenium (III) chloride hydrate ( $\text{RuCl}_3 \cdot x\text{H}_2\text{O}$ , 37%), urea ( $\text{CH}_4\text{N}_2\text{O}$ , AR), ammonium fluoride ( $\text{NH}_4\text{F}$ , AR), and ruthenium (IV) oxide ( $\text{RuO}_2$ ) were purchased from Shanghai Aladdin Biochemical Technology Co. Ltd. All reagents were used directly without further purification.

## 1.2 Preparation of electrocatalysts

### 1.2.1 Preparation of $\text{RuO}_2/\text{Co}_3\text{O}_4$ on NF.

Before synthesis, nickel foam (NF) was treated ultrasonically in acetone, 1 M hydrochloric acid, deionized water, and ethanol for 10 minutes to enhance its hydrophilicity. Next, 0.58 g of  $\text{Co}(\text{NO}_3)_2 \cdot 6\text{H}_2\text{O}$ , 0.3 g of  $\text{NH}_4\text{F}$ , and 0.6 g of  $\text{CH}_4\text{N}_2\text{O}$  were stirred in 40 mL of deionized water for 4 hours to form a uniform pink solution. This solution was then transferred to a 50 mL autoclave, and a piece of NF ( $2 \times 3 \text{ cm}^2$ ) was fully immersed in the solution. The autoclave was sealed and heated at  $120^\circ\text{C}$  for 9 hours. After cooling to room temperature, the NF containing the precursor was washed repeatedly with deionized water and dried in a vacuum oven at  $60^\circ\text{C}$  for 12 hours to obtain CoCH. The resulting sample was heated to  $350^\circ\text{C}$  at a rate of  $5^\circ\text{C}$  per minute in an air atmosphere and held for 3 hours to obtain  $\text{Co}_3\text{O}_4$ .  $\text{Co}_3\text{O}_4$  was then soaked for 9 hours in a  $5 \text{ mg mL}^{-1}$   $\text{RuCl}_3$  aqueous solution, followed by vacuum drying overnight at  $60^\circ\text{C}$  and annealing for 2 hours in an air atmosphere at  $320^\circ\text{C}$ . The final product was named  $\text{RuO}_2/\text{Co}_3\text{O}_4$ . The loading of Ru was adjusted by soaking in  $5 \text{ mg mL}^{-1}$   $\text{RuCl}_3$  aqueous solution for different times.

### 1.2.2 Preparation of $\text{RuO}_2$ on NF.

The commercial  $\text{RuO}_2$  (5 mg) was dispersed into a mixture of 700  $\mu\text{L}$  ethanol, 250  $\mu\text{L}$  Isopropanol and 50  $\mu\text{L}$  Nafion (5%), and the mixture was ultrasonicated for 30 min to form homogeneous ink. Then, a certain amount ink was loaded onto nickel foam and dried at room

temperature. The loading amount of RuO<sub>2</sub> on the 1\*1 cm<sup>2</sup> NF was about 2.5 mg cm<sup>-2</sup>, which was the same amount with the as-prepared electrocatalysts.

### 1.3 Characterization

Morphology and microstructure were observed using scanning electron microscopy (SEM, Hitachi S-4800) and transmission electron microscopy (TEM, Thermo Fisher Scientific Talos F200i). The dynamic contact angle was measured using an OCA20 instrument. The elements were analyzed by ICP-OES (inductively coupled plasma light emission spectrometry). X-ray powder diffraction (XRD, Bruker D8 Advance) was used to analyze the phase structure of the catalyst. The Bruker EMX-6/1 instrument was used to measure electron paramagnetic resonance (EPR) data and determine oxygen vacancies. The valence and surface atomic ratios of the catalysts were obtained using X-ray photoelectron spectroscopy (XPS, Shimadzu AXIS Supra+).

### 1.4 Electrochemical measurements

All electrochemical experiments were carried out using a three-electrode system in 1 M KOH, with RuO<sub>2</sub>Co<sub>3</sub>O<sub>4</sub>/NF, carbon rod and Hg/HgO<sub>2</sub> electrodes as the working electrode, the opposition electrode and the reference electrode, respectively. The potential was modified to a reversible hydrogen electrode (RHE) by Nestor's equation ( $ERHE = E_{Hg/HgO_2} + 0.616V + 0.0591 \times pH$ ). Linear scanning voltammetry (LSV) curves are obtained at a scanning rate of 1 mV S<sup>-1</sup>. Electrochemical surface area (ECSA) is determined by measuring capacitance at scan rates of 2, 4, 6, 8, and 10 mV s<sup>-1</sup>. Electrochemical impedance spectroscopy (EIS) measurements were performed in the frequency range 0.01 to 100 kHz with an AC amplitude of 5 mV.

### 1.5 Assembly of water-splitting electrolyzer

For testing in a AEMWE (Model: BKT2-SN-22-8X, manufactured by Jiangsu BOKE Co., Ltd., China), we prepared a AEMWE by sandwiching the Pt/C cathode and RuO<sub>2</sub>/Co<sub>3</sub>O<sub>4</sub> anode between a commercial membrane (Fumasep FAB-PK-130). In the AEMWE system, the 1.0 M KOH electrolyte is supplied to the cathode and anode at a flow rate of 40 mL min<sup>-1</sup>. The

performance of the device is determined by measuring the LSV curve in the range 1.0 to 2.0 V, with a scan rate of 5 mV S<sup>-1</sup>. To ensure the accuracy of the data, the performance test was performed three times to calculate the margin of error. For durability testing, AEMWE runs continuously with a peristaltic pump flow of 40 mL min<sup>-1</sup> to circulate the electrolyte.

## Supplementary figures

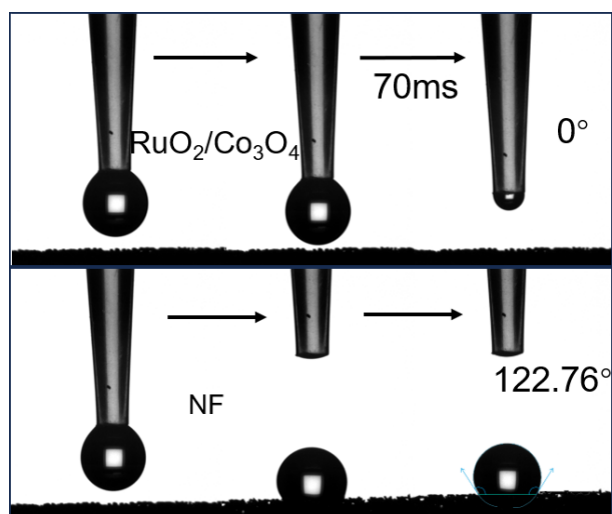

**Fig. S1** Dynamic contact angle test of RuO<sub>2</sub>/Co<sub>3</sub>O<sub>4</sub> and NF.

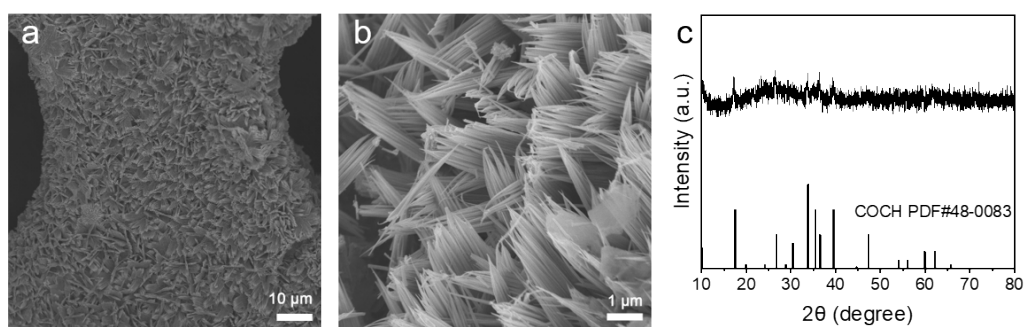

**Fig. S2** (a-b) SEM images of CoCH. (C) XRD patterns of CoCH.

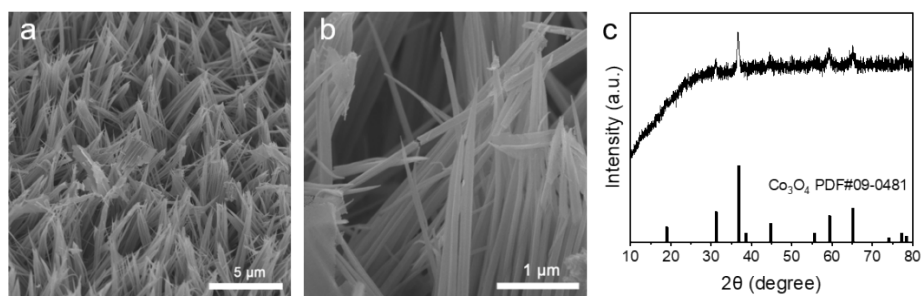

**Fig. S3** (a-b) SEM images of RuO<sub>2</sub>/Co<sub>3</sub>O<sub>4</sub>. (c) XRD patterns of Co<sub>3</sub>O<sub>4</sub>.

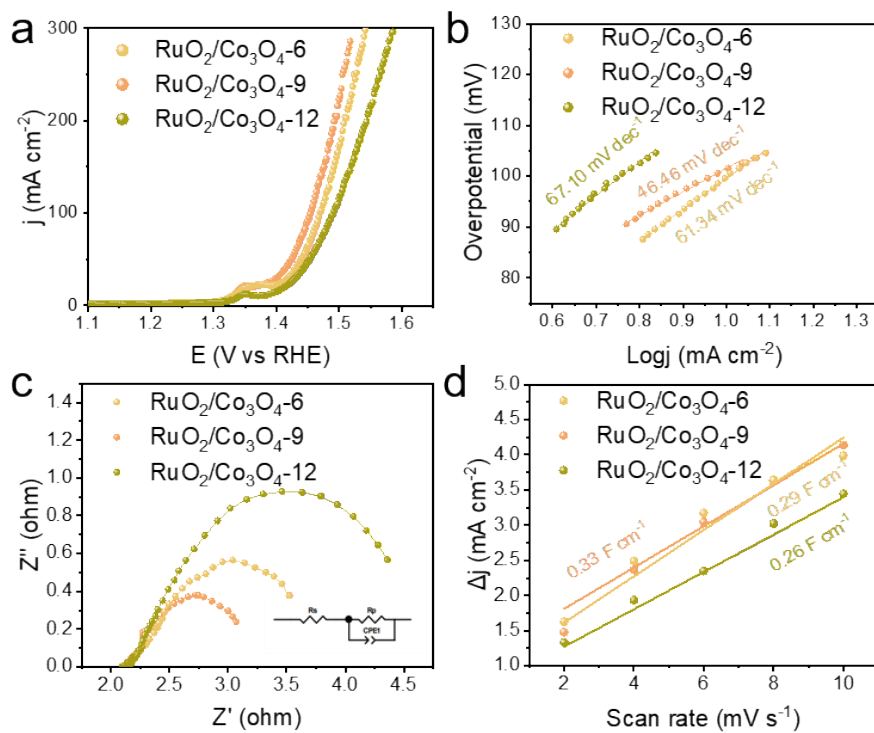

**Fig. S4** (a) LSV curves, (b) corresponding Tafel slopes, (c) EIS Nyquist plots, (d) capacitive current density against the scan rate of  $\text{RuO}_2/\text{Co}_3\text{O}_4$ -6,  $\text{RuO}_2/\text{Co}_3\text{O}_4$ -9 and  $\text{RuO}_2/\text{Co}_3\text{O}_4$ -12.



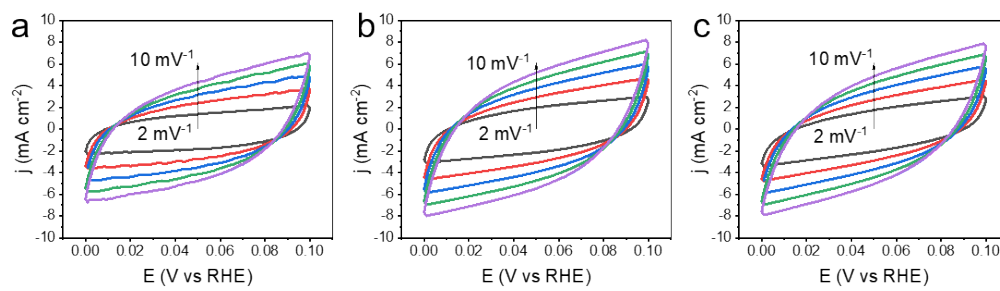

**Fig. S5** CV curves of (a) RuO<sub>2</sub>/Co<sub>3</sub>O<sub>4</sub>-6, (b) RuO<sub>2</sub>/Co<sub>3</sub>O<sub>4</sub>-9 and (c) RuO<sub>2</sub>/Co<sub>3</sub>O<sub>4</sub>-12.

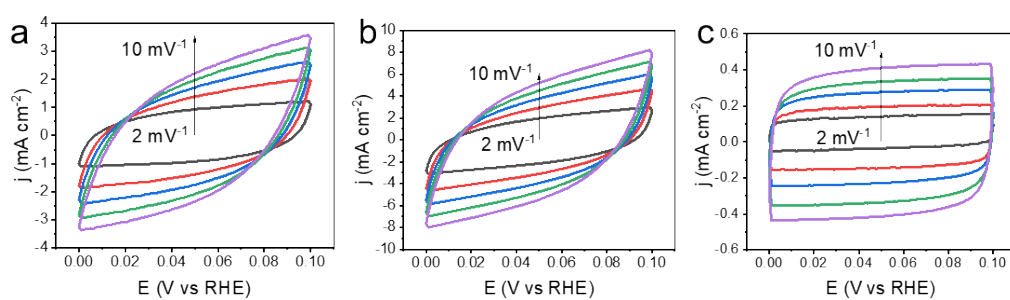

**Fig. S6** CV curves of (a)  $\text{Co}_3\text{O}_4$ , (b)  $\text{RuO}_2/\text{Co}_3\text{O}_4$ -9 and (c) com.  $\text{RuO}_2$ .

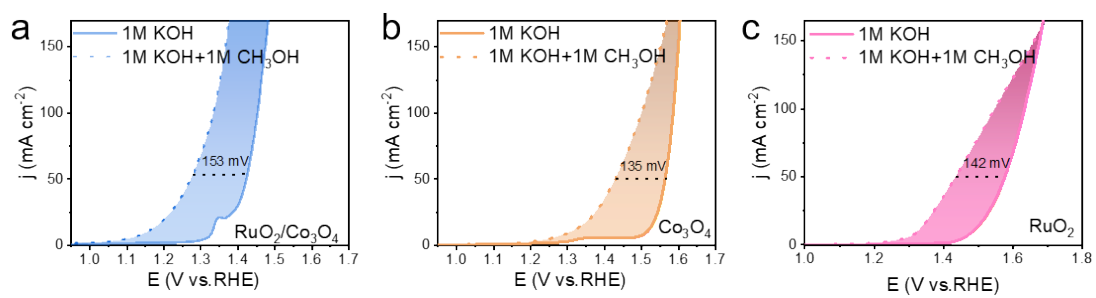

**Fig. S7** Polarization curves of (e) RuO<sub>2</sub>/Co<sub>3</sub>O<sub>4</sub>, (b) Co<sub>3</sub>O<sub>4</sub> and (f) com. RuO<sub>2</sub> in 0.5 M KOH solution with (dashed lines) and without (solid lines) 1 M methanol.

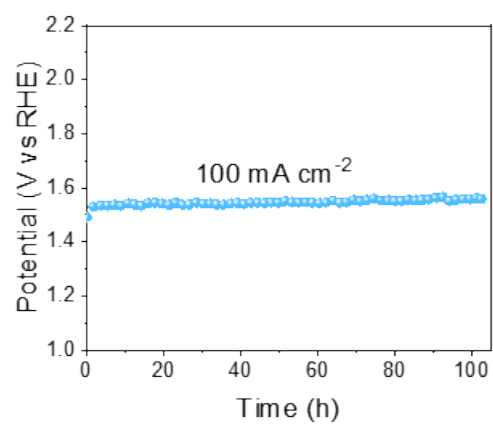

**Fig. S8** The CP curves of RuO<sub>2</sub>/Co<sub>3</sub>O<sub>4</sub> operated at 100 mA cm<sup>-2</sup>.

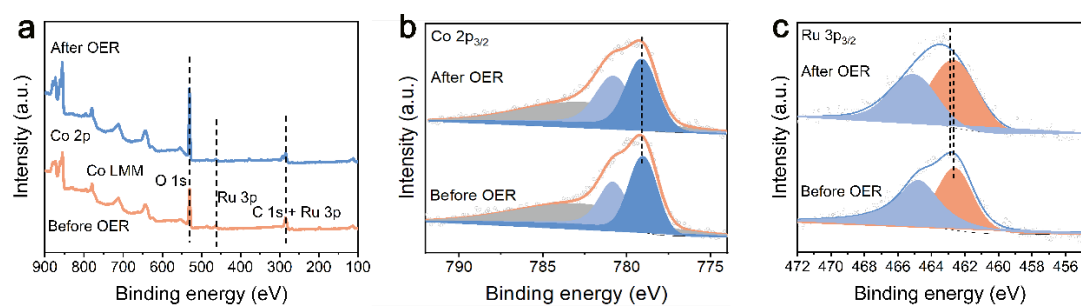

**Fig. S9** (a) The whole XPS spectra, (b) Co 2p<sub>3/2</sub>, (c) Ru 3p<sub>3/2</sub> XPS spectra of RuO<sub>2</sub>/Co<sub>3</sub>O<sub>4</sub> before and after stability test.

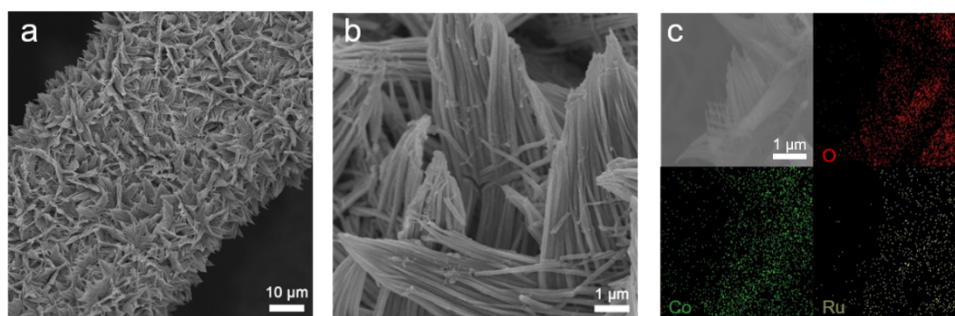

**Fig. S10** (a-b) SEM, and (c) EDX mapping images of  $\text{RuO}_2/\text{Co}_3\text{O}_4$  after stability test.

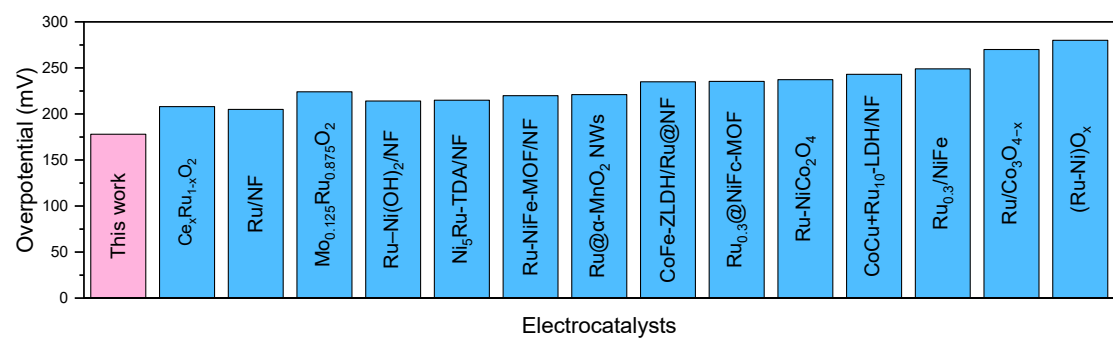

**Fig. S10** Comparison of the OER overpotentials (at 10 mA cm<sup>-2</sup>) of the RuO<sub>2</sub>/Co<sub>3</sub>O<sub>4</sub> with recently reported Ru-based electrocatalysts.

**Table S1** The ruthenium loads in samples with different ion exchange times were determined

| Catalyst                                             | Ru (wt%) | Co (wt%) |
|------------------------------------------------------|----------|----------|
| RuO <sub>2</sub> /Co <sub>3</sub> O <sub>4</sub> -6  | 13.8     | 86.2     |
| RuO <sub>2</sub> /Co <sub>3</sub> O <sub>4</sub> -9  | 17.5     | 82.5     |
| RuO <sub>2</sub> /Co <sub>3</sub> O <sub>4</sub> -12 | 20.4     | 79.4     |

by ICP-OES analysis.



| Catalyst                                               | $\eta$ at 10 mA·cm <sup>-2</sup> | Reference |
|--------------------------------------------------------|----------------------------------|-----------|
| Ce <sub>x</sub> Ru <sub>1-x</sub> O <sub>2</sub>       | 208                              | Ref. S1   |
| Ru/NF                                                  | 202                              | Ref. S2   |
| Mo <sub>0.125</sub> Ru <sub>0.875</sub> O <sub>2</sub> | 224                              | Ref. S3   |
| Ru-Ni(OH) <sub>2</sub> /NF                             | 210                              | Ref. S4   |
| Ni <sub>5</sub> Ru-TDA/NF                              | 215                              | Ref. S5   |
| Ru-NiFe-MOF/NF                                         | 219                              | Ref. S6   |
| Ru@ $\alpha$ -MnO <sub>2</sub> NWs                     | 221                              | Ref. S7   |
| CoFe-ZLDH/Ru@NF                                        | 235                              | Ref. S8   |
| Ru <sub>0.3</sub> @NiFe-MOF                            | 235                              | Ref. S9   |
| Ru-NiCo <sub>2</sub> O <sub>4</sub>                    | 237                              | Ref. S10  |
| CoCu+Ru <sub>10</sub> -LDH/NF                          | 243                              | Ref. S11  |
| Ru <sub>0.3</sub> /NiFe                                | 249                              | Ref. S12  |
| Ru/Co <sub>3</sub> O <sub>4-x</sub>                    | 270                              | Ref. S13  |
| (Ru-Ni)O <sub>x</sub>                                  | 280                              | Ref. S14  |

**Table S2** Comparison of OER activities of recently reported electrocatalysts containing Ru.

## References

- 1 P. Wang, J. Mu, G. Feng, Y. Fan, Y. Pan, L. Diao, Z. Miao and J. Zhou, *Chem. Commun.*, 2025.
- 2 Y. Hou, Z. Qin, X. Han, Y. Liu, W. Zhang, X. Cao, Y. Cao, J.-P. Lang and H. Gu, *Nanoscale*, 2024, **16**, 6662–6668.
- 3 Y. Liu, R. Deng, Y. Song, W. Tan, X. Tao, S. Luo, D. Long, S. Chen and Z. Wei, *Chem. Commun.*, 2025, **61**, 4547–4550.
- 4 C. Li, B. Kim, Z. Li, R. Thapa, Y. Zhang, J. Seo, R. Guan, F. Tang, J. Baek, Y. H. Kim, J. Jeon, N. Park and J. Baek, *Adv. Mat.*, 2024, **36**, 2403151.
- 5 J. Lin, H. Wang, C. Wang, L. Guo and Y. Wang, *Electrochim. Acta*, 2023, **470**, 143300.
- 6 W. Jiang, J. Wang, Y. Jiang, Y. Wu, B. Liu, X. Chu, C. Liu, G. Che and Y. Lu, *J. Mater. Chem. A*, 2023, **11**, 2769–2779.
- 7 N. Li, A. Yang, M. Jin, S. Wang, P. Yu, J. Wang and H. Jin, *Chem. Commun.*, 2025, **61**, 2762–2765.
- 8 H. Wang, Y. Zhang, G. Wu, L. Guo and Y. Wang, *Int. J. of Hydrogen Energy*, 2024, **64**, 261–268.
- 9 T. Liu, Y. Guan, Y. Wu, X. Chu, B. Liu, N. Zhang, C. Liu, W. Jiang and G. Che, *Int. J. of Hydrogen Energy*, 2024, **57**, 408–419.
- 10 Y. Wang, L. Chen, H. Zhang, M. Humayun, J. Duan, X. Xu, Y. Fu, M. Bououdina and C. Wang, *Green Chem.*, 2023, **25**, 8181–8195.
- 11 Y. Wang, L. Jing, W. Jiang, Y. Wu, B. Liu, Y. Sun, X. Chu and C. Liu, *J. of Colloid and Interface Sci.*, 2024, **671**, 283–293.
- 12 H. Xu, G. Xin, W. Hu, Z. Zhang, C. Si, J. Chen, L. Lu, Y. Peng and X. Li, *Appl. Catal. B Environ.*, 2023, **339**, 123157.
- 13 C.-Z. Yuan, S. Wang, K. San Hui, K. Wang, J. Li, H. Gao, C. Zha, X. Zhang, D. A. Dinh, X.-L. Wu, Z. Tang, J. Wan, Z. Shao and K. N. Hui, *ACS Catal.*, 2023, **13**, 2462–2471.
- 14 H. Zhang, Y. Lv, C. Chen, C. Lv, X. Wu, J. Guo and D. Jia, *Appl. Catal. B Environ.*, 2021, **298**, 120611.
